# Supplementary material for: Quantitative MRI-based radiomics for noninvasively predicting molecular subtypes and survival in glioma patients
Source: PubMed Central journal article supplement (PMC8313682; doi:10.1038/s41698-021-00205-z), 2021-07-26
Supplement: 41698_2021_205_MOESM1_ESM.pdf [file 41698_2021_205_MOESM1_ESM.pdf]

## Supplementary Materials

**Supplementary Note 1:** Feature extraction methods.

**Supplementary Note 2:** The hyper-parameters setting of Bayesian-regularization neural networks (BRNN) and the results of 10-fold cross-validation

**Supplementary Note 3:** Confusion matrix of the image fusion models for predicting IDH, 1p/19q, and TERT status

**Supplementary Note 4:** The formula of image fusion models for predicting IDH mutation, 1p19q codeletion, and TERT promoter mutation, which were built by logistic regression based on the scores of single-layered methods

**Supplementary Note 5:** The HRs and 95%CI for WHO grade and the predictive molecular groups in assessment of PFS and OS.

**Supplementary Figure 1:** Flowchart of patient inclusion.

**Supplementary Figure 2:** Representative results of cases in triple-positive, IDH and TERT mutations, IDH mutation only, TERT mutation only, and triple-negative groups of gliomas.

**Supplementary Figure 3:** The barplots for the training cohort and the validation cohort with the prediction value for each patient: (a-b) IDH prediction values in the training cohort and validation cohort; (c-d) 1p/19q prediction values in the training and validation cohorts; and (e-f) TERT prediction values in the training and validation cohorts.

**Supplementary Figure 4.** Kaplan-Meier curves of the predictive molecular groups. (a) PFS in the training cohort; (b) PFS in the validation cohort; (c) OS in the training cohort; and (d) OS in the validation cohort.

**Supplementary Table 1:** MR imaging acquisition parameters.

**Supplementary Table 2:** Comparison of patient and tumor characteristics between the training and validation cohort.

**Supplementary Table 3:** The number of retained features after each step of feature selection

**Supplementary Table 4:** The selected features from each MR sequence

**Supplementary Table 5.** The performance of single-layered radiomic signatures for prediction of IDH mutation status

**Supplementary Table 6.** The performance of single-layered radiomic signatures for prediction of 1p/19q codeletion status

**Supplementary Table 7.** The performance of single-layered radiomic signatures for prediction of TERT promoter mutation status.

**Supplementary Figure 1: Flowchart of patient inclusion**

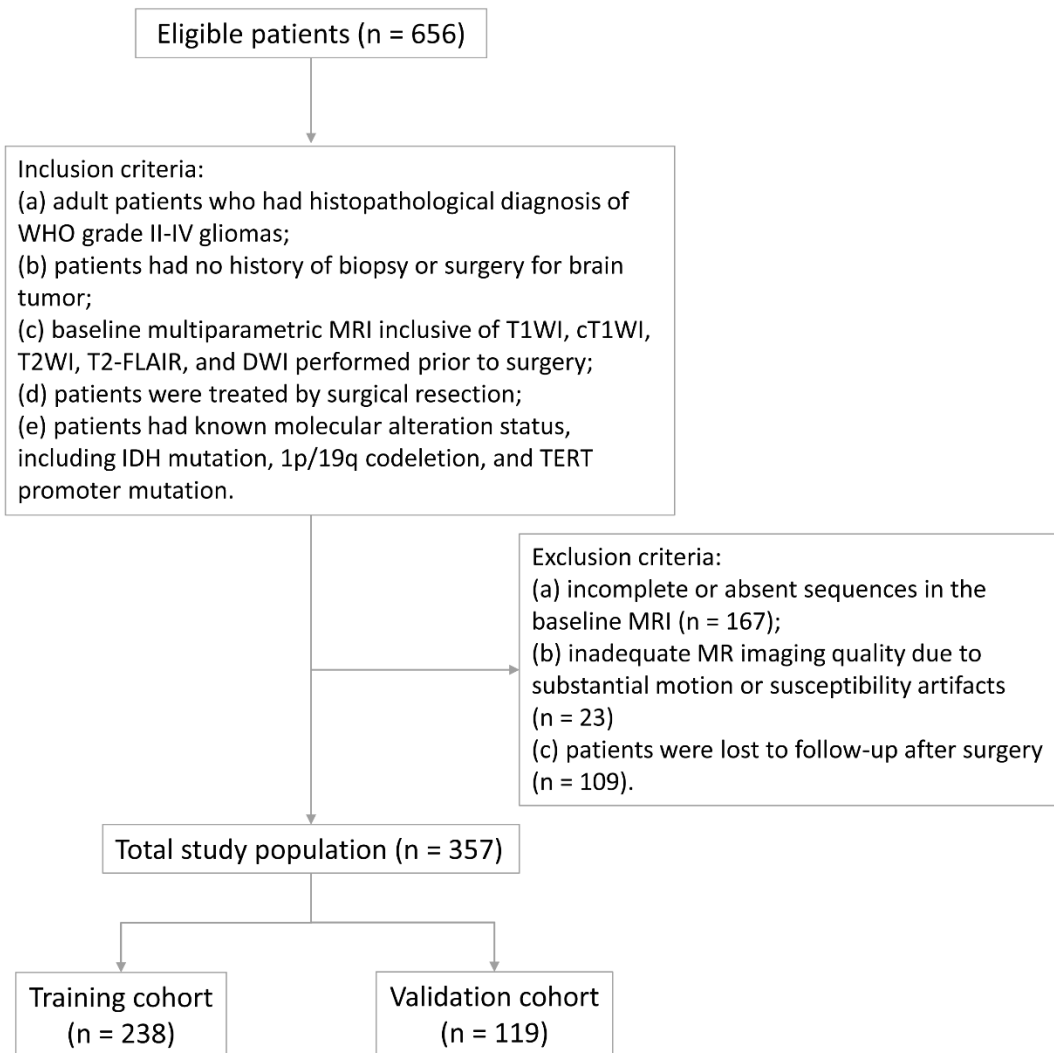

**Supplementary Figure 2:** Representative results of cases in triple-positive, IDH and TERT mutations, IDH mutation only, TERT mutation only, and triple-negative groups of gliomas.

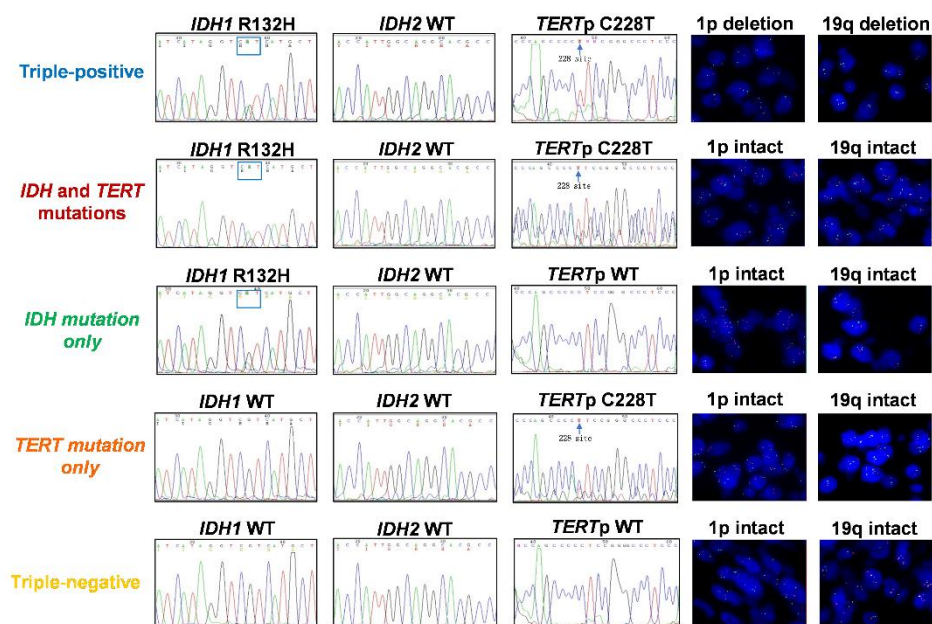

**Supplementary Table 1: MR imaging acquisition parameters**

All MR images were acquired on either 1.5 T or 3.0 T clinical MR scanners. The 1.5 T scanners included Siemens Healthcare (Magnetom Avanto, Erlangen, Germany) with a 12-channel head coil, and Philips Healthcare (Achieva, Best, Netherlands) with a 16-channel head coil. The 3.0 T scanners included GE Healthcare (Discovery MR750, Milwaukee, WI, USA) with an 8-channel head coil, or Siemens Healthcare (Magnetom Skyra/verio, Erlangen, Germany) with an integrated 20-channel head and neck coil and a 12-channel head coil.

| Imaging parameters     | Skyra<br>(Siemens) | Verio<br>(Siemens) | Discovery<br>MR750<br>(GE) | Avanto<br>(Siemens) | Achieva<br>(Philips) |
|------------------------|--------------------|--------------------|----------------------------|---------------------|----------------------|
| Field strength (T)     | 3                  | 3                  | 3                          | 1.5                 | 1.5                  |
| Head coil channel      | 20                 | 12                 | 8                          | 12                  | 16                   |
| T1WI/cT1WI             |                    |                    |                            |                     |                      |
| TR (ms)                | 220                | 220                | 1750                       | 202                 | 498                  |
| TE (ms)                | 2.46               | 2.48               | 24                         | 4.76                | 15                   |
| Section thickness (mm) | 5                  | 5                  | 5                          | 5                   | 6                    |
| Intersection gap (mm)  | 1.5                | 1.5                | 1.5                        | 1.5                 | 1                    |

|                              |           |           |           |           |           |
|------------------------------|-----------|-----------|-----------|-----------|-----------|
| FA (°)                       | 70        | 80        | 111       | 70        | 69        |
| NEX                          | 1         | 1         | 1         | 1         | 1         |
| FOV (mm)                     | 230 × 230 | 220 × 206 | 240 × 180 | 230 × 187 | 230 × 184 |
| Matrix                       | 288 × 216 | 320 × 210 | 320 × 256 | 256 × 256 | 184 × 184 |
| T2WI                         |           |           |           |           |           |
| TR (ms)                      | 5000      | 3900      | 5390      | 4200      | 2000      |
| TE (ms)                      | 117       | 92        | 79        | 90        | 100       |
| Section thickness (mm)       | 5         | 5         | 5         | 5         | 6         |
| Intersection gap (mm)        | 1.5       | 1.5       | 1.5       | 1.5       | 1         |
| FA (°)                       | 90        | 150       | 142       | 150       | 90        |
| NEX                          | 1         | 1         | 1         | 1         | 2         |
| FOV (mm)                     | 240 × 240 | 240 × 193 | 240 × 240 | 230 × 184 | 230 × 184 |
| Matrix                       | 320 × 320 | 320 × 210 | 512 × 512 | 320 × 256 | 220 × 220 |
| T2-FLAIR                     |           |           |           |           |           |
| TR (ms)                      | 6500      | 6000      | 8400      | 4900      | 6000      |
| TE (ms)                      | 85        | 94        | 150       | 90        | 120       |
| TI (ms)                      | 2126.8    | 2030      | 2100      | 1780      | 2000      |
| Section thickness (mm)       | 5         | 5         | 5         | 5         | 6         |
| Intersection gap (mm)        | 1.5       | 1.5       | 1.5       | 1.5       | 1         |
| FA (°)                       | 150       | 150       | 111       | 150       | 90        |
| NEX                          | 1         | 1         | 1         | 1         | 2         |
| FOV (mm)                     | 240 × 240 | 220 × 193 | 240 × 240 | 230 × 190 | 230 × 198 |
| Matrix                       | 256 × 179 | 256 × 157 | 256 × 256 | 256 × 256 | 256 × 256 |
| DWI                          |           |           |           |           |           |
| TR (ms)                      | 4600      | 3700      | 6000      | 3400      | 2226      |
| TE (ms)                      | 80        | 102       | 87        | 112       | 51        |
| Section thickness (mm)       | 5         | 5         | 5         | 5         | 6         |
| Intersection gap (mm)        | 1.5       | 1.5       | 1.5       | 1.5       | 1         |
| B value (s/mm <sup>2</sup> ) | 0, 1000   | 0, 1000   | 0, 1000   | 0, 1000   | 0, 1000   |
| FA (°)                       | 90        | 90        | 90        | 90        | 90        |
| NEX                          | 1         | 1         | 1         | 2         | 1         |
| FOV (mm)                     | 240 × 240 | 220 × 220 | 240 × 240 | 230 × 230 | 230 × 230 |
| Matrix                       | 192 × 192 | 162 × 130 | 160 × 160 | 152 × 152 | 112 × 112 |

## Supplementary Note 1: Feature extraction methods

In this study, MR images were normalized before feature extraction by centering it at the mean with standard deviation in Pyradiomics 2.0.0 (<http://www.radiomics.io/pyradiomics.html>).

The formula of normalization was shown as following:

$$f(x) = \frac{s(x - \mu_x)}{\sigma_x}$$

Where:

$x$  and  $f(x)$  represent the original and normalized MR images, respectively.

$\mu_x$  and  $\sigma_x$  represent the mean and standard deviation of the image intensity values, respectively.

$s$  is a scaling factor. In this study,  $s$  was set to be 100.

After image normalization, a total of 8730 features were extracted based on the regions of tumor and edema from T1, cT1, T2, FLAIR, and apparent diffusion coefficient (ADC) map MR images. The same 873 features were extracted on both regions of tumor and edema from each sequence of MR images. These features could be divided into five groups: (I) histogram-based features (n=18), (II) shape and size-based features (n=13), (III) textural features (n=68), (IV) wavelet filter-based features (n=430), (V) Laplacian of Gaussian (LoG) filter-based features (n=258), and (VI) gradient filter features (n=86). The extraction methods of radiomic features are shown below:

### ❖ Histogram-based features

Histogram-based features describe the distribution of pixel intensity. Let  $X$  denote the image matrix with  $N$  voxels and  $P$  the histogram with  $N_i$  discrete intensity levels. The following histogram-based features were extracted:

1. Energy:

$$energy = \sum_i^N X(i)^2$$

2. Total energy

$$\text{total energy} = \text{PixelSpacing}(X) \sum_i^N X(i)^2$$

3. Entropy:

$$\text{entropy} = - \sum_{i=1}^{N_l} P(i) \log_2 P(i)$$

4. Kurtosis:

$$\text{kurtosis} = \frac{\frac{1}{N} \sum_{i=1}^N (X(i) - \bar{X})^4}{\left( \sqrt{\frac{1}{N} \sum_{i=1}^N (X(i) - \bar{X})^2} \right)^2}$$

where  $\bar{X}$  is the mean of  $X$ .

5. Maximum:

The maximum intensity value of  $X$ .

6. Mean:

$$\text{mean} = \frac{1}{N} \sum_i^N X(i)$$

7. Mean absolute deviation:

The mean of the absolute deviations of all voxel intensities around the mean intensity value.

8. Median:

The median intensity value of  $X$ .

9. Minimum:

The minimum intensity value of  $X$ .

10. Range:

The range of intensity values of  $X$ .

11. Root mean square (RMS):

$$\text{RMS} = \sqrt{\frac{\sum_i^N X(i)^2}{N}}$$

12. Skewness:

$$skewness = \frac{\frac{1}{N} \sum_{i=1}^N (X(i) - \bar{X})^3}{\left( \sqrt{\frac{1}{N} \sum_{i=1}^N (X(i) - \bar{X})^2} \right)^3}$$

where  $\bar{X}$  is the mean of  $X$ .

13. Interquartile range:

The difference between 75<sup>th</sup> and 25<sup>th</sup> percentiles of intensity values of  $X$ .

14. 10<sup>th</sup> Percentile

The 10<sup>th</sup> percentile of intensity values of  $X$

15. 90<sup>th</sup> Percentile

The 90<sup>th</sup> percentile of intensity values of  $X$

16. Robust mean absolute deviation

Robust mean absolute deviation is the mean distance of all intensity values from the mean value calculated on the subset of image array with gray levels in between, or equal to the 10<sup>th</sup> and 90<sup>th</sup> percentile.

17. Uniformity:

$$uniformity = \sum_{i=1}^{N_l} P(i)^2$$

18. Variance:

$$variance = \frac{1}{N-1} \sum_{i=1}^N (X(i) - \bar{X})^2$$

where  $\bar{X}$  is the mean of  $X$ .

#### ❖ Shape and size features

This group features describe the shape and size of the tumor region. Let  $V$  represents the volume and  $A$  the surface area of the volume of interest. The following shape and size features were extracted:

1. Maximum 3D diameter

Maximum 3D diameter is defined as the largest pairwise Euclidean distance between

ROI surface mesh vertices.

2. Maximum 2D diameter (row):

The maximum two-dimensional tumor diameter is measured as the largest pairwise Euclidean distance between voxels on the surface of the tumor volume in the column-slice plane.

3. Maximum 2D diameter (column):

The maximum two-dimensional tumor diameter is measured as the largest pairwise Euclidean distance between voxels on the surface of the tumor volume in the row-slice plane.

4. Maximum 2D diameter (slice):

The maximum two-dimensional tumor diameter is measured as the largest pairwise Euclidean distance between voxels on the surface of the tumor volume in the row-column plane.

5. Sphericity:

$$sphericity = \frac{\pi^{\frac{1}{3}}(6V)^{\frac{2}{3}}}{A}$$

6. Surface area:

The surface area is calculated by triangulation (i.e. dividing the surface into connected triangles) and is defined as:

$$A = \sum_{i=1}^N \frac{1}{2} |a_i b_i \times a_i c_i|$$

Where  $N$  is the total number of triangles covering the surface and  $a$ ,  $b$  and  $c$  are edge vectors of the triangles.

7. Surface to volume ratio:

$$surface\ to\ volume\ ratio = \frac{A}{V}$$

8. Volume:

The volume ( $V$ ) of the tumor is determined by counting the number of pixels in the tumor region and multiplying this value by the voxel size.

9. Major axis



$$major\ axis = 4\sqrt{\lambda_{major}}$$

where  $\lambda_{major}$  is the length of the largest principal component axis.

10. Minor axis

$$minor\ axis = 4\sqrt{\lambda_{minor}}$$

where  $\lambda_{minor}$  is the length of the second largest principal component axis.

11. Least axis

$$least\ axis = 4\sqrt{\lambda_{least}}$$

Where  $\lambda_{least}$  is the length of the least principal component axis.

12. Elongation

$$elongation = \sqrt{\frac{\lambda_{minor}}{\lambda_{major}}}$$

13. Flatness

$$flatness = \sqrt{\frac{\lambda_{least}}{\lambda_{major}}}$$

#### ❖ Textural features

The textural features provide the information regarding the relative position of the various gray levels over the image, and describe patterns or the spatial distribution of voxel intensities. In this study, the textural features were extracted based on four textural matrices: Gray Level Co-occurrence Matrix (GLCM), Gray Level Run Length Matrix (GLRLM), Gray Level Size Zone Matrix (GLSZM), and Gray Level Dependence Matrix (GLDM). Determining textural matrix representations requires the image intensity values within value of interest to be discretized. Image intensities were therefore resampled into equally spaced bins using a bin-width of 10 (The bin-width is determined by the grayscale range/bins of the image. In FBS, when the number of bins is set to 32, the feature is more stable. In this study, the number of bins is also set to 32. The highest point of the histogram of the grayscale distribution after image preprocessing corresponds to the grayscale range of 300, thus we set the bin-width to 10). This discretization step not only reduces image noise, but also normalizes intensities across all patients, allowing for a direct comparison of all calculated textural features between patients.

### Gray Level Co-occurrence Matrix based features

A GLCM is defined as  $\mathbf{P}(i, j, \delta, \alpha)$ , a matrix with size  $N_g \times N_g$  describing the second-order joint probability function of an image, where the  $(i, j)$ th element represents the number of times the combination of intensity levels  $i$  and  $j$  occur in two pixels in the image, that are separated by a distance  $\delta$  of pixels in direction  $\alpha$ , and  $N_g$  is the number of discrete gray level intensities. In this study, distance  $\delta$  was 1 and direction  $\alpha$  was belonging to  $\{0^\circ, 45^\circ, 90^\circ, 135^\circ\}$ , yielding a total of 4 GLCM for each image. From these gray level co-occurrence matrices, several textural features are derived. Each gray level co-occurrence-based feature was then calculated as the mean of the feature calculations for each of the 4 directions.

Let:

$\mathbf{P}(i, j)$  be the GLCM for an arbitrary  $\delta$  and  $\alpha$ ,

$N_g$  be the number of discrete intensity levels in the image,

$\mu$  be the mean of  $\mathbf{P}(i, j)$ ,

$p_x(i) = \sum_{j=1}^{N_g} \mathbf{P}(i, j)$  be the marginal row probabilities,

$p_y(i) = \sum_{i=1}^{N_g} \mathbf{P}(i, j)$  be the marginal column probabilities,

$\mu_x$  be the mean of  $p_x$ ,

$\mu_y$  be the mean of  $p_y$ ,

$\sigma_x$  be the standard deviation of  $p_x$ ,

$\sigma_y$  be the standard deviation of  $p_y$ ,

$p_{x+y}(k) = \sum_{i=1}^{N_g} \sum_{j=1}^{N_g} \mathbf{P}(i, j), i + j = k, k = 2, 3, \dots, 2N_g,$

$p_{x-y}(k) = \sum_{i=1}^{N_g} \sum_{j=1}^{N_g} \mathbf{P}(i, j), |i - j| = k, k = 0, 1, 2, 3, \dots, N_g - 1,$

$HX = -\sum_{i=1}^{N_g} p_x(i) \log_2[p_x(i)]$  be the entropy of  $p_x$ ,

$HY = -\sum_{i=1}^{N_g} p_y(i) \log_2[p_y(i)]$  be the entropy of  $p_y$ ,

$H = -\sum_{i=1}^{N_g} \sum_{j=1}^{N_g} \mathbf{P}(i,j) \log_2[\mathbf{P}(i,j)]$  be the entropy of  $\mathbf{P}(i,j)$ ,

$HXY1 = -\sum_{i=1}^{N_g} \sum_{j=1}^{N_g} \mathbf{P}(i,j) \log_2[p_x(i)p_y(i)]$ ,

$HXY2 = -\sum_{i=1}^{N_g} \sum_{j=1}^{N_g} p_x(i)p_y(i) \log_2[p_x(i)p_y(i)]$ ,

1. Joint average

$$\text{joint average} = \sum_{i=1}^{N_g} \sum_{j=1}^{N_g} i\mathbf{P}(i,j)$$

2. Joint entropy

$$\text{joint entropy} = -\sum_{i=1}^{N_g} \sum_{j=1}^{N_g} \mathbf{P}(i,j) \log_2 \mathbf{P}(i,j)$$

3. Joint energy

$$\text{joint energy} = \sum_{i=1}^{N_g} \sum_{j=1}^{N_g} (\mathbf{P}(i,j))^2$$

4. Autocorrelation:

$$\text{autocorrelation} = \sum_{i=1}^{N_g} \sum_{j=1}^{N_g} ij\mathbf{P}(i,j)$$

5. Cluster Prominence:

$$\text{cluster prominence} = \sum_{i=1}^{N_g} \sum_{j=1}^{N_g} [i+j - \mu_x(i) - \mu_y(j)]^4 \mathbf{P}(i,j)$$

6. Cluster Shade:

$$\text{cluster shade} = \sum_{i=1}^{N_g} \sum_{j=1}^{N_g} [i+j - \mu_x(i) - \mu_y(j)]^3 \mathbf{P}(i,j)$$

7. Cluster Tendency:

$$\text{cluster tendency} = \sum_{i=1}^{N_g} \sum_{j=1}^{N_g} [i+j - \mu_x(i) - \mu_y(j)]^2 \mathbf{P}(i,j)$$

8. Contrast:

$$contrast = \sum_{i=1}^{N_g} \sum_{j=1}^{N_g} |i - j|^2 \mathbf{P}(i, j)$$

9. Correlation:

$$correlation = \frac{\sum_{i=1}^{N_g} \sum_{j=1}^{N_g} ij \mathbf{P}(i, j) - \mu_x(i) \mu_y(j)}{\sigma_x(i) \sigma_y(j)}$$

10. Difference entropy:

$$difference\ entropy = - \sum_{i=1}^{N_g-1} \mathbf{P}_{x-y}(i) \log_2[\mathbf{P}_{x-y}(i)]$$

11. Inverse difference:

$$inverse\ difference = \sum_{i=1}^{N_g} \sum_{j=1}^{N_g} \frac{\mathbf{P}(i, j)}{1 + |i - j|}$$

12. Informational measure of correlation 1 (IMC1):

$$IMC1 = \frac{HXY - HXY1}{\max\{HX, HY\}}$$

13. Informational measure of correlation 2 (IMC2):

$$IMC2 = \sqrt{1 - e^{1 - (HXY2 - HXY)}}$$

14. Inverse Difference Moment (IDM):

$$IDM = \sum_{i=1}^{N_g} \sum_{j=1}^{N_g} \frac{\mathbf{P}(i, j)}{1 + |i - j|^2}$$

15. Inverse Difference Moment Normalized (IDMN):

$$IDMN = \sum_{i=1}^{N_g} \sum_{j=1}^{N_g} \frac{\mathbf{P}(i, j)}{1 + \frac{|i - j|^2}{N^2}}$$

16. Inverse Difference Normalized (IDN):

$$IDN = \sum_{i=1}^{N_g} \sum_{j=1}^{N_g} \frac{\mathbf{P}(i, j)}{1 + \frac{|i - j|}{N}}$$

17. Inverse variance:

$$inverse\ variance = \sum_{i=1}^{N_g} \sum_{j=1}^{N_g} \frac{\mathbf{P}(i, j)}{|i - j|^2}, i \neq j$$

18. Difference average (DA):

$$\text{difference average} = \sum_{k=0}^{N_g-1} k p_{x-y}(k)$$

19. Difference variance (DV):

$$\text{difference variance} = \sum_{k=0}^{N_g-1} (k - DA)^2 p_{x-y}(k)$$

20. Maximum probability:

$$\text{maximum probability} = \max \{ \mathbf{P}(i, j) \}$$

21. Sum entropy:

$$\text{sum entropy} = - \sum_{i=2}^{2N_g} \mathbf{P}_{x+y}(i) \log_2 [\mathbf{P}_{x+y}(i)]$$

22. Sum squares:

$$\text{sum squares} = \sum_{i=1}^{N_g} \sum_{j=1}^{N_g} (i - \mu_x)^2 \mathbf{P}(i, j)$$

### Gray Level Run Length Matrix based features

Run length metrics quantify gray level runs in an image. A gray level run is defined as the length in number of pixels, of consecutive pixels that have the same gray level value. In a GLRLM  $p(i, j|\theta)$ , the  $(i, j)$ th element describes the number of times  $j$  a gray level  $i$  appears consecutively in the direction specified by  $\theta$ , and  $N_g$  is the number of discrete gray level intensities. In this study, a GLRLM was computed for each direction in set  $\{0^\circ, 45^\circ, 90^\circ, 135^\circ\}$ , from which the below textural features were derived. Each GLRLM based feature was then calculated as the mean of the feature values for each of the 4 directions.

Let:

$p(i, j|\theta)$  be the  $(i, j)$ th entry in the given run-length matrix  $p$  for a direction  $\theta$ ,

$N_g$  the number of discrete intensity values in the image,

$N_r$  the number of different run lengths,

$N_p$  the number of voxels in the image.

1. Short run emphasis (SRE):

$$SRE = \frac{\sum_{i=1}^{N_g} \sum_{j=1}^{N_r} \left[ \frac{p(i, j|\theta)}{j^2} \right]}{\sum_{i=1}^{N_g} \sum_{j=1}^{N_r} p(i, j|\theta)}$$

2. Long run emphasis (LRE):

$$LRE = \frac{\sum_{i=1}^{N_g} \sum_{j=1}^{N_r} j^2 p(i, j | \theta)}{\sum_{i=1}^{N_g} \sum_{j=1}^{N_r} p(i, j | \theta)}$$

3. Gray level non-uniformity (GLN):

$$GLN = \frac{\sum_{i=1}^{N_g} [\sum_{j=1}^{N_r} p(i, j | \theta)]^2}{\sum_{i=1}^{N_g} \sum_{j=1}^{N_r} p(i, j | \theta)}$$

4. Gray level non-uniformity normalized (GLNN):

$$GLNN = \frac{\sum_{i=1}^{N_g} [\sum_{j=1}^{N_r} p(i, j | \theta)]^2}{(\sum_{i=1}^{N_g} \sum_{j=1}^{N_r} p(i, j | \theta))^2}$$

5. Run length non-uniformity (RLN):

$$RLN = \frac{\sum_{i=1}^{N_r} [\sum_{j=1}^{N_g} p(i, j | \theta)]^2}{\sum_{i=1}^{N_g} \sum_{j=1}^{N_r} p(i, j | \theta)}$$

6. Run length non-uniformity normalized (RLNN):

$$RLNN = \frac{\sum_{i=1}^{N_r} [\sum_{j=1}^{N_g} p(i, j | \theta)]^2}{(\sum_{i=1}^{N_g} \sum_{j=1}^{N_r} p(i, j | \theta))^2}$$

7. Run percentage (RP):

$$RP = \frac{\sum_{i=1}^{N_g} \sum_{j=1}^{N_r} p(i, j | \theta)}{N_p}$$

8. Gray level variance (GLV):

$$GLV = \sum_{i=1}^{N_g} \sum_{j=1}^{N_r} p(i, j | \theta) (i - \mu)^2$$

$$\text{Here, } \mu = \sum_{i=1}^{N_g} \sum_{j=1}^{N_r} p(i, j | \theta) i$$

9. Run variance

$$RV = \sum_{i=1}^{N_g} \sum_{j=1}^{N_r} p(i, j | \theta) (j - \mu)^2$$

$$\text{Here, } \mu = \sum_{i=1}^{N_g} \sum_{j=1}^{N_r} p(i, j | \theta) j$$

10. Run entropy (RE):

$$RE = - \sum_{i=1}^{N_g} \sum_{j=1}^{N_r} p(i, j | \theta) \log_2 p(i, j | \theta)$$

11. Low gray level run emphasis (LGLRE):

$$LGLRE = \frac{\sum_{i=1}^{N_g} \sum_{j=1}^{N_r} \left[ \frac{p(i,j|\theta)}{i^2} \right]}{\sum_{i=1}^{N_g} \sum_{j=1}^{N_r} p(i,j|\theta)}$$

12. High gray level run emphasis (HGLRE):

$$HGLRE = \frac{\sum_{i=1}^{N_g} \sum_{j=1}^{N_r} i^2 p(i,j|\theta)}{\sum_{i=1}^{N_g} \sum_{j=1}^{N_r} p(i,j|\theta)}$$

13. Short run low gray level emphasis (SRLGLE):

$$SRLGLE = \frac{\sum_{i=1}^{N_g} \sum_{j=1}^{N_r} \left[ \frac{p(i,j|\theta)}{i^2 j^2} \right]}{\sum_{i=1}^{N_g} \sum_{j=1}^{N_r} p(i,j|\theta)}$$

14. Short run high gray level emphasis (SRHGLE):

$$SRHGLE = \frac{\sum_{i=1}^{N_g} \sum_{j=1}^{N_r} \left[ \frac{p(i,j|\theta)}{j^2} \right]}{\sum_{i=1}^{N_g} \sum_{j=1}^{N_r} p(i,j|\theta)}$$

15. Long run low gray level emphasis (LRLGLE):

$$LRLGLE = \frac{\sum_{i=1}^{N_g} \sum_{j=1}^{N_r} \left[ \frac{p(i,j|\theta) j^2}{i^2} \right]}{\sum_{i=1}^{N_g} \sum_{j=1}^{N_r} p(i,j|\theta)}$$

16. Long run high gray level emphasis (LRHGLE):

$$LRHGLE = \frac{\sum_{i=1}^{N_g} \sum_{j=1}^{N_r} [p(i,j|\theta) j^2 i^2]}{\sum_{i=1}^{N_g} \sum_{j=1}^{N_r} p(i,j|\theta)}$$

### Gray level size zone matrix-based features

Gray level size zone matrices quantify gray level zones in an image. A gray level zone is defined as the number of connected voxels that share the same gray level intensity. A voxel is considered connected if the distance is 1 according to the infinity norm (26-connected region in a 3D, 8-connected region in a 2D). In a gray level size zone matrix  $\mathbf{P}(i,j)$  the  $(i,j)^{\text{th}}$  element equals the numbers of zones with gray level  $i$  and size  $j$  appear in image. The GLSZM is rotation independent, with only one matrix calculated for all directions in the ROI.

Let:

$N_g$  be the number of discrete intensity values in the image,

$N_s$  be the number of discrete zone sizes in the image,

$N_p$  be the number of voxels in the image,

$N_z$  be the number of zones in the ROI, which is equal to  $\sum_{i=1}^{N_g} \sum_{j=1}^{N_s} \mathbf{P}(i, j)$  and  $1 \leq N_z \leq N_p$ ,

$\mathbf{P}(i, j)$  be the size zone matrix,

$p(i, j)$  be the normalized size zone matrix, defined as  $p(i, j) = \frac{\mathbf{P}(i, j)}{N_z}$

1. Small area emphasis (SAE):

$$SAE = \frac{\sum_{i=1}^{N_g} \sum_{j=1}^{N_s} \left[ \frac{\mathbf{P}(i, j)}{j^2} \right]}{N_z}$$

2. Large area emphasis (LAE):

$$LAE = \frac{\sum_{i=1}^{N_g} \sum_{j=1}^{N_s} j^2 \mathbf{P}(i, j)}{N_z}$$

3. Gray level non-uniformity (GLN):

$$GLN = \frac{\sum_{i=1}^{N_g} \left[ \sum_{j=1}^{N_s} \mathbf{P}(i, j) \right]^2}{N_z}$$

4. Gray level non-uniformity normalized (GLNN):

$$GLNN = \frac{\sum_{i=1}^{N_g} \left[ \sum_{j=1}^{N_s} p(i, j) \right]^2}{(N_z)^2}$$

5. Size zone non-uniformity (SZN):

$$SZN = \frac{\sum_{i=1}^{N_s} \left[ \sum_{j=1}^{N_g} \mathbf{P}(i, j) \right]^2}{N_z}$$

6. Size zone non-uniformity normalized (RLNN):

$$SZNN = \frac{\sum_{i=1}^{N_s} \left[ \sum_{j=1}^{N_g} \mathbf{P}(i, j) \right]^2}{(N_z)^2}$$

7. Zone percentage (ZP):

$$ZP = \frac{N_z}{N_p}$$

8. Gray level variance (GLV):

$$GLV = \sum_{i=1}^{N_g} \sum_{j=1}^{N_s} p(i, j) (i - \mu)^2$$

Here,  $\mu = \sum_{i=1}^{N_g} \sum_{j=1}^{N_s} p(i, j) i$

9. Zone variance (ZV):



$$ZV = \sum_{i=1}^{N_g} \sum_{j=1}^{N_s} p(i,j)(j - \mu)^2$$

$$\text{Here, } \mu = \sum_{i=1}^{N_g} \sum_{j=1}^{N_s} p(i,j)j$$

10. Zone entropy (ZE):

$$ZE = - \sum_{i=1}^{N_g} \sum_{j=1}^{N_s} p(i,j) \log_2 p(i,j)$$

11. Low gray level zone emphasis (LGLZE):

$$LGLZE = \frac{\sum_{i=1}^{N_g} \sum_{j=1}^{N_s} \left[ \frac{p(i,j)}{i^2} \right]}{N_z}$$

12. High gray level zone emphasis (HGLZE):

$$HGLZE = \frac{\sum_{i=1}^{N_g} \sum_{j=1}^{N_s} i^2 p(i,j)}{N_z}$$

13. Small area low gray level emphasis (SALGLE):

$$SALGLE = \frac{\sum_{i=1}^{N_g} \sum_{j=1}^{N_s} \left[ \frac{p(i,j)}{i^2 j^2} \right]}{N_z}$$

14. Small area high gray level emphasis (SAHGLE):

$$SRHGLE = \frac{\sum_{i=1}^{N_g} \sum_{j=1}^{N_s} \left[ \frac{p(i,j) i^2}{j^2} \right]}{N_z}$$

15. Large area low gray level emphasis (LALGLE):

$$LALGLE = \frac{\sum_{i=1}^{N_g} \sum_{j=1}^{N_s} \left[ \frac{p(i,j) j^2}{i^2} \right]}{N_z}$$

16. Large area high gray level emphasis (LAHGLE):

$$LAHGLE = \frac{\sum_{i=1}^{N_g} \sum_{j=1}^{N_s} [p(i,j) j^2 i^2]}{N_z}$$

### Gray level dependence matrix-based features

Gray level dependence matrices quantify gray level dependencies in an image. A gray level dependency is defined as the number of connected voxels within distance  $\delta$  that are dependent on the center voxel. A neighboring voxel with gray level  $j$  is considered dependent on center voxel with gray level  $i$  if  $|i-j| \leq \alpha$ . In a gray level dependence matrix  $\mathbf{P}(i,j)$  the  $(i,j)^{\text{th}}$

element describes the number of times a voxel with gray level  $i$  with  $j$  dependent voxels in its neighborhood appears in image.

Let:

$N_g$  be the number of discrete intensity values in the image,

$N_d$  be the number of discrete dependency sizes in the image,

$N_z$  be the number of dependency zones in the image, which is equal to  $\sum_{i=1}^{N_g} \sum_{j=1}^{N_d} \mathbf{P}(i, j)$ ,

$\mathbf{P}(i, j)$  be the dependency matrix,

$p(i, j)$  be the normalized size zone matrix, defined as  $p(i, j) = \frac{\mathbf{P}(i, j)}{N_z}$

1. Small dependence emphasis (SDE):

$$SDE = \frac{\sum_{i=1}^{N_g} \sum_{j=1}^{N_d} \left[ \frac{\mathbf{P}(i, j)}{i^2} \right]}{N_z}$$

2. Large dependence emphasis (LDE):

$$LDE = \frac{\sum_{i=1}^{N_g} \sum_{j=1}^{N_d} j^2 \mathbf{P}(i, j)}{N_z}$$

3. Gray level non-uniformity (GLN):

$$GLN = \frac{\sum_{i=1}^{N_g} [\sum_{j=1}^{N_d} \mathbf{P}(i, j)]^2}{N_z}$$

4. Dependence non-uniformity (DN):

$$DN = \frac{\sum_{i=1}^{N_d} [\sum_{j=1}^{N_g} \mathbf{P}(i, j)]^2}{(N_z)^2}$$

5. Dependence non-uniformity normalized (DNN):

$$DNN = \frac{\sum_{i=1}^{N_d} [\sum_{j=1}^{N_g} \mathbf{P}(i, j)]^2}{(N_z)^2}$$

6. Gray level variance (GLV):

$$GLV = \sum_{i=1}^{N_g} \sum_{j=1}^{N_d} p(i, j) (i - \mu)^2$$

Here,  $\mu = \sum_{i=1}^{N_g} \sum_{j=1}^{N_d} p(i, j) i$

7. Dependence variance (DV):

$$DV = \sum_{i=1}^{N_g} \sum_{j=1}^{N_d} p(i,j)(j - \mu)^2$$

Here,  $\mu = \sum_{i=1}^{N_g} \sum_{j=1}^{N_d} p(i,j)j$

8. Dependence entropy (DE):

$$DE = - \sum_{i=1}^{N_g} \sum_{j=1}^{N_d} p(i,j) \log_2 p(i,j)$$

9. Low gray level emphasis (LGLE):

$$LGLE = \frac{\sum_{i=1}^{N_g} \sum_{j=1}^{N_d} [\frac{p(i,j)}{i^2}]}{N_z}$$

10. High gray level emphasis (HGLE):

$$HGLE = \frac{\sum_{i=1}^{N_g} \sum_{j=1}^{N_d} i^2 p(i,j)}{N_z}$$

11. Small dependence low gray level emphasis (SDLGLE):

$$SDLGLE = \frac{\sum_{i=1}^{N_g} \sum_{j=1}^{N_d} [\frac{p(i,j)}{i^2 j^2}]}{N_z}$$

12. Small dependence high gray level emphasis (SDHGLE):

$$SDHGLE = \frac{\sum_{i=1}^{N_g} \sum_{j=1}^{N_s} [\frac{p(i,j) i^2}{j^2}]}{N_z}$$

13. Large dependence low gray level emphasis (LDLGLE):

$$LDLGLE = \frac{\sum_{i=1}^{N_g} \sum_{j=1}^{N_d} [\frac{p(i,j) j^2}{i^2}]}{N_z}$$

14. Large dependence high gray level emphasis (LDHGLE):

$$LDHGLE = \frac{\sum_{i=1}^{N_g} \sum_{j=1}^{N_d} [p(i,j) j^2 i^2]}{N_z}$$

#### ❖ Wavelet features: Histogram-based and textural features of wavelet decompositions

Undecimated Wavelet transformation was adopted to capture the features on the regions of interest from different scales in low- and high-frequencies. Here, we applied “coiflet1” wavelet transformation to decompose the original image into 4 parts. L and H indicated low- and high-

pass functions, respectively. The wavelet decompositions of the original image X were labeled as  $X_{LL}$ ,  $X_{LH}$ ,  $X_{HL}$ , and  $X_{HH}$ . For example,  $X_{LH}$  represents the image filtered with low-pass function in the x-directions and high-pass function in the y-direction, as follows:

$$X_{LH}(i, j) = \sum_{p=1}^{Nl} \sum_{q=1}^{Nh} L(p)H(q)X(i + p, j + q)$$

Where  $Nl$  is the length of filter L,  $Nh$  is the length of filter H. For each decomposition, we computed the histogram-based features and the textural features. In addition, features from wavelet decompositions  $X_{LLL}$  were also extracted.

▪ **LoG features: Histogram-based and textural features of Laplacian of Gaussian**

The Laplacian of an image brings out area of rapid intensity change and is usually used for edge detection. A Gaussian filter is applied prior to the Laplacian to smooth the image and reduce noise.

The equation of LoG with 2D kernel various

$$LoG(x, y) = -\frac{1}{\pi\sigma^4} \left[ 1 - \frac{x^2 + y^2}{2\sigma^2} \right] e^{-\frac{x^2 + y^2}{2\sigma^2}}$$

$$\sigma \in [1mm, 3mm, 5mm]$$

Textural size (fine to coarse) was highlighted by modifying Gaussian radius parameter (from 0.5mm to 5mm, 0.5mm increment). Histogram-based and textural features of Laplacian of Gaussian were extracted.

▪ **gradient features: Histogram-based and textural features of gradient magnitude images**

An image gradient is a directional change in the intensity or color in an image. Mathematically, the gradient of the image intensity function at each image point is a 2D vector with the components given by the derivatives in the horizontal and vertical directions.

$$\nabla f = \begin{bmatrix} g_x \\ g_y \end{bmatrix} = \begin{bmatrix} \frac{\partial f}{\partial x} \\ \frac{\partial f}{\partial y} \end{bmatrix},$$

where:

$\frac{\partial f}{\partial x}$  is the derivative with respect to x (gradient in x direction)

$\frac{\partial f}{\partial y}$  is the derivative with respect to x (gradient in y direction).

The gradient magnitude is calculated by the following formula:

$$G = \sqrt{g_x^2 + g_y^2}.$$

Based on the calculated gradient magnitude  $G$ , histogram-based and textural features were extracted.

**Supplementary Table 2. Comparison of patient and tumor characteristics between the training and validation cohort**

| Characteristics                  | Training cohort<br>(n = 238) | Validation cohort<br>(n = 119) | P value |
|----------------------------------|------------------------------|--------------------------------|---------|
| Age at initial diagnosis (years) |                              |                                | 0.159   |
| ≤40                              | 68 (28.6)                    | 25 (21.0)                      |         |
| >40                              | 170 (71.4)                   | 94 (79.0)                      |         |
| Sex                              |                              |                                | 0.652   |
| Male                             | 133 (55.9)                   | 63 (52.9)                      |         |
| Female                           | 105 (44.1)                   | 56 (47.1)                      |         |
| KPS score on admission           |                              |                                | 0.809   |
| <80                              | 73 (30.7)                    | 38 (31.9)                      |         |
| ≥80                              | 165 (69.3)                   | 81 (68.1)                      |         |
| Tumor location                   |                              |                                | 0.466   |
| Frontal lobe                     | 88 (37.0)                    | 51 (42.9)                      |         |
| Temporal lobe                    | 48 (20.2)                    | 19 (16.0)                      |         |
| Parietal lobe                    | 10 (4.2)                     | 8 (6.7)                        |         |
| Occipital lobe                   | 6 (2.5)                      | 3 (2.5)                        |         |
| Insular lobe                     | 5 (2.1)                      | 5 (4.2)                        |         |
| Multicenter                      | 81 (34.0)                    | 33 (27.7)                      |         |
| Laterality                       |                              |                                | 0.646   |
| Left                             | 113 (47.5)                   | 55 (46.2)                      |         |
| Right                            | 120 (50.4)                   | 63 (52.9)                      |         |
| Bilateral                        | 5 (2.1)                      | 1 (0.8)                        |         |
| WHO grade                        |                              |                                | 0.815   |

|                              |            |           |       |
|------------------------------|------------|-----------|-------|
| II                           | 112 (47.1) | 58 (48.7) |       |
| III                          | 53 (22.3)  | 23 (19.3) |       |
| IV                           | 73 (30.7)  | 38 (31.9) |       |
| Histologic type              |            |           | 0.532 |
| Astrocytoma                  | 65 (27.3)  | 26 (21.8) |       |
| Oligodendroglioma            | 101 (42.4) | 55 (46.2) |       |
| Glioblastoma                 | 72 (30.3)  | 38 (31.9) |       |
| Extent of surgical resection |            |           | 0.087 |
| Gross total resection        | 188 (79.0) | 84 (70.6) |       |
| Subtotal resection           | 50 (21.0)  | 35 (29.4) |       |
| <i>IDH</i> mutation          |            |           | 0.260 |
| Yes                          | 105 (44.1) | 60 (50.4) |       |
| No                           | 133 (55.9) | 59 (49.6) |       |
| 1p/19q codeletion            |            |           | 0.612 |
| Yes                          | 61 (25.6)  | 34 (28.6) |       |
| No                           | 177 (74.4) | 85 (71.4) |       |
| <i>TERT</i> mutation         |            |           | 0.822 |
| Yes                          | 122 (51.3) | 63 (52.9) |       |
| No                           | 116 (48.7) | 56 (47.1) |       |
| Radiotherapy                 |            |           | 0.897 |
| Yes                          | 177 (74.4) | 90 (75.6) |       |
| No                           | 61 (25.6)  | 29 (24.4) |       |
| Chemotherapy                 |            |           | 0.075 |
| Temozolomide                 | 53 (22.3)  | 32 (26.9) |       |
| Nimustine / Fotemustine      | 93 (39.1)  | 32 (26.9) |       |
| None                         | 92 (39.1)  | 55 (46.2) |       |
| Median PFS (months)          | 30.8       | 29.6      | 0.402 |
| Median OS (months)           | 34.5       | 33.0      | 0.332 |

**Note:** Numbers in parenthesis are percentage; KPS, Karnofsky Performance Status; WHO, World Health Organization; *IDH*, isocitrate dehydrogenase; *TERT*, telomerase reverse transcriptase; PFS, progression free survival; OS, overall survival.

**Supplementary Table 3: The number of retained features after each step of feature selection**

|                 | <b>Selection</b> | <b>IDH</b> | <b>1p/19q</b> | <b>TERT</b> |
|-----------------|------------------|------------|---------------|-------------|
| <b>T1WI</b>     | Step 1           | 576        | 576           | 576         |
|                 | Step 2           | 299        | 299           | 299         |
|                 | Step 3           | 267        | 248           | 17          |
|                 | Step 4           | 18         | 24            | 5           |
|                 | Step 5           | 4          | 2             | 4           |
| <b>T2WI</b>     | Step 1           | 1134       | 1134          | 1134        |
|                 | Step 2           | 673        | 673           | 673         |
|                 | Step 3           | 631        | 518           | 32          |
|                 | Step 4           | 39         | 27            | 10          |
|                 | Step 5           | 7          | 3             | 3           |
| <b>T2-FLAIR</b> | Step 1           | 840        | 840           | 840         |
|                 | Step 2           | 544        | 544           | 773         |
|                 | Step 3           | 526        | 480           | 9           |
|                 | Step 4           | 33         | 16            | 6           |
|                 | Step 5           | 7          | 3             | 2           |
| <b>cT1WI</b>    | Step 1           | 618        | 618           | 618         |
|                 | Step 2           | 328        | 328           | 514         |
|                 | Step 3           | 301        | 280           | 20          |
|                 | Step 4           | 20         | 25            | 11          |
|                 | Step 5           | 8          | 4             | 2           |
| <b>ADC</b>      | Step 1           | 832        | 832           | 832         |
|                 | Step 2           | 584        | 584           | 584         |
|                 | Step 3           | 548        | 489           | 10          |
|                 | Step 4           | 23         | 24            | 5           |
|                 | Step 5           | 6          | 5             | 3           |

**Supplementary Table 4: The final features used for construction of single-layered radiomic signatures**

| <b>IDH mutation</b> |                                                              |
|---------------------|--------------------------------------------------------------|
| <b>Sequences</b>    | <b>Feature name</b>                                          |
| T1WI                | Tumor_original_shape_Maximum2DDiameterRow                    |
|                     | Edema_original_shape_Maximum3DDiameter                       |
|                     | Edema_wavelet-HH_gldm_LargeDependenceLowGrayLevelEmphasis    |
|                     | Edema_wavelet-LH_glszm_LargeAreaLowGrayLevelEmphasis         |
| cT1WI               | Tumor_log-sigma-1-0-mm-3D_firstorder_RootMeanSquared         |
|                     | Tumor_log-sigma-1-0-mm-3D_glrlm_GrayLevelNonUniformity       |
|                     | Tumor_log-sigma-3-0-mm-3D_glszm_GrayLevelNonUniformity       |
|                     | Tumor_log-sigma-5-0-mm-3D_glrlm_LongRunHighGrayLevelEmphasis |

|          |                                                                                                                                                                                                                                                                                                                             |
|----------|-----------------------------------------------------------------------------------------------------------------------------------------------------------------------------------------------------------------------------------------------------------------------------------------------------------------------------|
|          | Tumor_wavelet-LH_firstorder_Kurtosis<br>Edema_original_shape_Maximum3DDiameter<br>Edema_log-sigma-1-0-mm-3D_glszm_LargeAreaLowGrayLevelEmphasis<br>Edema_log-sigma-3-0-mm-3D_firstorder_Median                                                                                                                              |
| T2WI     | Tumor_log-sigma-1-0-mm-3D_firstorder_Median<br>Tumor_wavelet-HL_gldm_GrayLevelNonUniformity<br>Tumor_wavelet-HL_firstorder_Kurtosis<br>Tumor_wavelet-LH_gldm_LargeDependenceHighGrayLevelEmphasis<br>original_firstorder_Kurtosis<br>Edema_original_shape_Maximum3DDiameter<br>Edema_gradient_firstorder_Kurtosis           |
| T2-FLAIR | Tumor_log-sigma-3-0-mm-3D_glszm_GrayLevelNonUniformity<br>Tumor_wavelet-HL_glcm_ClusterShade<br>Tumor_wavelet-LL_firstorder_Kurtosis<br>Edema_original_shape_Maximum3DDiameter<br>Edema_wavelet-LL_gldm_LargeDependenceHighGrayLevelEmphasis<br>Edema_wavelet-LL_firstorder_Minimum<br>Edema_wavelet-LH_firstorder_Kurtosis |
| ADC      | Tumor_original_shape_Maximum2DDiameterRow<br>Tumor_log-sigma-3-0-mm-3D_firstorder_Median<br>Tumor_log-sigma-5-0-mm-3D_firstorder_90Percentile<br>Tumor_original_firstorder_Kurtosis<br>Edema_original_shape_Maximum3DDiameter<br>Edema_log-sigma-3-0-mm-3D_glcm_ClusterShade                                                |

### 1p/19q codeletion

| Sequences | Feature name                                                                                                                                                                                                                                        |
|-----------|-----------------------------------------------------------------------------------------------------------------------------------------------------------------------------------------------------------------------------------------------------|
| T1WI      | Edema_log-sigma-5-0-mm-3D_firstorder_RootMeanSquared<br>Edema_log-sigma-5-0-mm-3D_glszm_SmallAreaHighGrayLevelEmphasis                                                                                                                              |
| cT1WI     | Tumor_log-sigma-1-0-mm-3D_firstorder_Mean<br>Tumor_original_gldm_LargeDependenceHighGrayLevelEmphasis<br>Tumor_original_firstorder_Kurtosis<br>Edema_log-sigma-5-0-mm-3D_firstorder_RootMeanSquared                                                 |
| T2WI      | Edema_gradient_firstorder_Kurtosis<br>Edema_wavelet-HL_gldm_LargeDependenceEmphasis<br>Edema_wavelet-HH_firstorder_Kurtosis                                                                                                                         |
| T2-FLAIR  | Tumor_log-sigma-3-0-mm-3D_glcm_ClusterShade<br>Tumor_wavelet-HL_glcm_ClusterShade<br>Edema_log-sigma-1-0-mm-3D_firstorder_RootMeanSquared                                                                                                           |
| ADC       | Tumor_log-sigma-5-0-mm-3D_firstorder_90Percentile<br>Edema_log-sigma-3-0-mm-3D_gldm_GrayLevelNonUniformity<br>Edema_wavelet-HL_firstorder_Kurtosis<br>Edema_wavelet-LH_glrlm_LongRunHighGrayLevelEmphasis<br>Edema_original_glszm_GrayLevelVariance |



---

**TERT promoter mutation**

---

|          |                                                                                                                                                                         |
|----------|-------------------------------------------------------------------------------------------------------------------------------------------------------------------------|
| T1WI     | Tumor_log-sigma-5-0-mm-3D_firstorder_10Percentile<br>Tumor_wavelet-LL_glcm_JointAverage<br>Tumor_wavelet-LL_glcm_ClusterShade<br>Tumor_original_firstorder_90Percentile |
| cT1WI    | Tumor_wavelet-LL_firstorder_Skewness<br>Tumor_original_glcm_Correlation                                                                                                 |
| T2WI     | Tumor_gradient_glszm_LargeAreaHighGrayLevelEmphasis<br>Tumor_log-sigma-1-0-mm-3D_firstorder_Median<br>Tumor_original_firstorder_Kurtosis                                |
| T2-FLAIR | Tumor_original_shape_Sphericity<br>Tumor_wavelet-LL_firstorder_Minimum                                                                                                  |
| ADC      | Tumor_log-sigma-1-0-mm-3D_firstorder_Median<br>Tumor_wavelet-HL_glcm_ClusterShade<br>Tumor_original_firstorder_Minimum                                                  |

---

**Supplementary Table 5. The performance of single-layered radiomic signatures for prediction of IDH mutation status**

| Sequence | WHO grade | Training cohort |               |               |               |               |               | Validation cohort |               |               |               |               |               |
|----------|-----------|-----------------|---------------|---------------|---------------|---------------|---------------|-------------------|---------------|---------------|---------------|---------------|---------------|
|          |           | AUC             | ACC           | SEN           | SPE           | PPV           | NPV           | AUC               | ACC           | SEN           | SPE           | PPV           | NPV           |
| T1WI     | II-IV     | 0.838           | 0.798         | 0.857         | 0.752         | 0.732         | 0.870         | 0.854             | 0.824         | 0.783         | 0.864         | 0.855         | 0.797         |
|          |           | (0.791-0.880)   | (0.756-0.840) | (0.798-0.909) | (0.687-0.813) | (0.661-0.795) | (0.818-0.917) | (0.792-0.911)     | (0.765-0.882) | (0.694-0.868) | (0.786-0.933) | (0.776-0.926) | (0.717-0.877) |
|          | II/III    | 0.785           | 0.758         | 0.889         | 0.561         | 0.752         | 0.771         | 0.868             | 0.840         | 0.837         | 0.842         | 0.857         | 0.821         |
|          |           | (0.720-0.846)   | (0.709-0.812) | (0.835-0.943) | (0.458-0.661) | (0.688-0.817) | (0.660-0.875) | (0.789-0.935)     | (0.765-0.901) | (0.739-0.925) | (0.732-0.933) | (0.766-0.938) | (0.710-0.917) |
|          | IV        | 0.542           | 0.890         | 0.333         | 0.940         | 0.333         | 0.940         | 0.818             | 0.789         | 0.647         | 0.905         | 0.846         | 0.760         |
|          |           | (0.421-0.667)   | (0.795-0.904) | (0.200-0.500) | (0.891-0.984) | (0.286-0.833) | (0.833-0.925) | (0.713-0.911)     | (0.632-0.789) | (0.545-0.731) | (0.750-1.000) | (0.842-1.000) | (0.389-0.652) |
| cT1WI    | II-IV     | 0.906           | 0.861         | 0.857         | 0.865         | 0.833         | 0.885         | 0.869             | 0.815         | 0.767         | 0.864         | 0.852         | 0.785         |
|          |           | (0.874-0.939)   | (0.828-0.899) | (0.800-0.911) | (0.815-0.915) | (0.774-0.892) | (0.837-0.929) | (0.807-0.927)     | (0.756-0.874) | (0.677-0.855) | (0.789-0.931) | (0.765-0.925) | (0.700-0.867) |
|          | II/III    | 0.838           | 0.830         | 0.879         | 0.758         | 0.845         | 0.806         | 0.882             | 0.852         | 0.837         | 0.868         | 0.878         | 0.825         |
|          |           | (0.779-0.893)   | (0.782-0.879) | (0.824-0.930) | (0.672-0.845) | (0.786-0.904) | (0.724-0.880) | (0.803-0.948)     | (0.790-0.914) | (0.738-0.923) | (0.771-0.951) | (0.784-0.956) | (0.722-0.919) |
|          | IV        | 0.935           | 0.932         | 0.500         | 0.970         | 0.600         | 0.956         | 0.846             | 0.737         | 0.588         | 0.857         | 0.769         | 0.720         |
|          |           | (0.893-0.969)   | (0.836-0.932) | (0.333-0.667) | (0.932-1.000) | (0.500-1.000) | (0.866-0.952) | (0.704-0.975)     | (0.579-0.763) | (0.484-0.682) | (0.667-1.000) | (0.786-1.000) | (0.333-0.609) |
| T2WI     | II-IV     | 0.875           | 0.832         | 0.829         | 0.835         | 0.798         | 0.860         | 0.817             | 0.782         | 0.700         | 0.864         | 0.840         | 0.739         |
|          |           | (0.836-0.912)   | (0.790-0.870) | (0.764-0.890) | (0.781-0.885) | (0.735-0.858) | (0.807-0.910) | (0.747-0.884)     | (0.714-0.840) | (0.603-0.797) | (0.782-0.932) | (0.745-0.915) | (0.645-0.825) |
|          | II/III    | 0.836           | 0.812         | 0.859         | 0.742         | 0.833         | 0.778         | 0.822             | 0.802         | 0.744         | 0.868         | 0.865         | 0.750         |
|          |           | (0.780-0.890)   | (0.764-0.861) | (0.800-0.915) | (0.657-0.833) | (0.770-0.893) | (0.697-0.864) | (0.730-0.907)     | (0.728-0.877) | (0.630-0.846) | (0.775-0.953) | (0.769-0.952) | (0.641-0.857) |
|          | IV        | 0.697           | 0.877         | 0.333         | 0.925         | 0.286         | 0.939         | 0.804             | 0.737         | 0.588         | 0.857         | 0.769         | 0.720         |
|          |           | (0.584-0.803)   | (0.767-0.890) | (0.182-0.500) | (0.869-0.969) | (0.250-0.750) | (0.831-0.924) | (0.687-0.900)     | (0.579-0.763) | (0.484-0.680) | (0.692-1.000) | (0.789-1.000) | (0.333-0.609) |
| T2-FLAIR | II-IV     | 0.879           | 0.811         | 0.848         | 0.782         | 0.754         | 0.867         | 0.846             | 0.798         | 0.750         | 0.847         | 0.833         | 0.769         |
|          |           | (0.840-0.916)   | (0.769-0.857) | (0.789-0.906) | (0.719-0.844) | (0.686-0.821) | (0.817-0.918) | (0.788-0.906)     | (0.739-0.857) | (0.662-0.839) | (0.774-0.922) | (0.755-0.917) | (0.681-0.850) |
|          | II/III    | 0.837           | 0.776         | 0.869         | 0.636         | 0.782         | 0.764         | 0.879             | 0.802         | 0.791         | 0.816         | 0.829         | 0.775         |
|          |           | (0.785-0.892)   | (0.727-0.830) | (0.811-0.926) | (0.543-0.735) | (0.718-0.845) | (0.667-0.862) | (0.814-0.940)     | (0.728-0.877) | (0.689-0.886) | (0.710-0.917) | (0.722-0.923) | (0.667-0.881) |
|          | IV        | 0.756           | 0.890         | 0.500         | 0.925         | 0.375         | 0.954         | 0.737             | 0.789         | 0.647         | 0.905         | 0.846         | 0.760         |
|          |           | (0.648-0.851)   | (0.795-0.918) | (0.333-0.667) | (0.862-0.969) | (0.357-0.800) | (0.862-0.950) | (0.636-0.830)     | (0.658-0.816) | (0.556-0.739) | (0.750-1.000) | (0.850-1.000) | (0.368-0.667) |
| ADC      | II-IV     | 0.866           | 0.819         | 0.876         | 0.774         | 0.754         | 0.888         | 0.842             | 0.807         | 0.783         | 0.831         | 0.825         | 0.790         |
|          |           | (0.824-0.905)   | (0.777-0.861) | (0.819-0.925) | (0.715-0.836) | (0.692-0.819) | (0.836-0.933) | (0.775-0.902)     | (0.748-0.866) | (0.685-0.868) | (0.746-0.906) | (0.729-0.906) | (0.696-0.873) |
|          | II/III    | 0.801           | 0.776         | 0.899         | 0.591         | 0.767         | 0.796         | 0.859             | 0.815         | 0.814         | 0.816         | 0.833         | 0.795         |
|          |           | (0.732-0.865)   | (0.721-0.836) | (0.850-0.944) | (0.484-0.696) | (0.704-0.833) | (0.692-0.886) | (0.786-0.924)     | (0.741-0.877) | (0.711-0.907) | (0.714-0.914) | (0.737-0.927) | (0.676-0.895) |
|          | IV        | 0.706           | 0.918         | 0.500         | 0.955         | 0.500         | 0.955         | 0.787             | 0.789         | 0.706         | 0.857         | 0.800         | 0.783         |
|          |           | (0.594-0.814)   | (0.836-0.932) | (0.333-0.667) | (0.908-1.000) | (0.455-1.000) | (0.866-0.952) | (0.691-0.862)     | (0.658-0.816) | (0.621-0.786) | (0.667-1.000) | (0.810-1.000) | (0.400-0.696) |

Note: AUC = area under the curve; SEN = sensitivity; SPE = specificity; ACC = accuracy; PPV = positive predictive value; NPV = negative predictive value; Data within parentheses represent 95% confidence interval (CI).

**Supplementary Table 6. The performance of single-layered radiomic signatures for prediction of 1p/19q codeletion status**

| Sequence | WHO grade | Training cohort        |                        |                        |                        |                        |                        | Validation cohort      |                        |                        |                        |                        |                        |
|----------|-----------|------------------------|------------------------|------------------------|------------------------|------------------------|------------------------|------------------------|------------------------|------------------------|------------------------|------------------------|------------------------|
|          |           | AUC                    | ACC                    | SEN                    | SPE                    | PPV                    | NPV                    | AUC                    | ACC                    | SEN                    | SPE                    | PPV                    | NPV                    |
| T1WI     | II-IV     | 0.763<br>(0.723-0.802) | 0.676<br>(0.626-0.727) | 0.902<br>(0.841-0.962) | 0.599<br>(0.535-0.659) | 0.437<br>(0.368-0.508) | 0.946<br>(0.912-0.981) | 0.722<br>(0.639-0.805) | 0.697<br>(0.630-0.765) | 0.794<br>(0.667-0.909) | 0.659<br>(0.581-0.744) | 0.482<br>(0.373-0.596) | 0.889<br>(0.817-0.954) |
|          | II/III    | 0.650<br>(0.600-0.704) | 0.576<br>(0.509-0.642) | 0.902<br>(0.833-0.966) | 0.385<br>(0.308-0.466) | 0.462<br>(0.385-0.539) | 0.870<br>(0.784-0.952) | 0.594<br>(0.505-0.682) | 0.568<br>(0.469-0.654) | 0.794<br>(0.677-0.907) | 0.404<br>(0.286-0.526) | 0.491<br>(0.378-0.597) | 0.731<br>(0.583-0.870) |
| cT1WI    | II-IV     | 0.794<br>(0.745-0.844) | 0.706<br>(0.660-0.756) | 0.918<br>(0.852-0.972) | 0.633<br>(0.576-0.694) | 0.463<br>(0.387-0.539) | 0.957<br>(0.925-0.984) | 0.815<br>(0.751-0.878) | 0.723<br>(0.655-0.790) | 0.794<br>(0.677-0.897) | 0.694<br>(0.609-0.774) | 0.509<br>(0.391-0.620) | 0.894<br>(0.831-0.953) |
|          | II/III    | 0.703<br>(0.636-0.770) | 0.612<br>(0.552-0.673) | 0.918<br>(0.860-0.969) | 0.433<br>(0.357-0.515) | 0.487<br>(0.412-0.568) | 0.900<br>(0.827-0.962) | 0.695<br>(0.599-0.787) | 0.605<br>(0.519-0.691) | 0.794<br>(0.667-0.906) | 0.468<br>(0.356-0.600) | 0.519<br>(0.404-0.633) | 0.759<br>(0.630-0.889) |
| T2WI     | II-IV     | 0.767<br>(0.728-0.804) | 0.668<br>(0.618-0.718) | 0.951<br>(0.898-0.985) | 0.571<br>(0.511-0.633) | 0.433<br>(0.360-0.500) | 0.971<br>(0.942-0.991) | 0.733<br>(0.661-0.797) | 0.630<br>(0.563-0.706) | 0.794<br>(0.676-0.897) | 0.565<br>(0.481-0.655) | 0.422<br>(0.323-0.532) | 0.873<br>(0.796-0.935) |
|          | II/III    | 0.655<br>(0.607-0.703) | 0.588<br>(0.527-0.655) | 0.951<br>(0.902-1.000) | 0.375<br>(0.300-0.454) | 0.472<br>(0.400-0.547) | 0.929<br>(0.857-1.000) | 0.600<br>(0.516-0.684) | 0.519<br>(0.420-0.605) | 0.794<br>(0.675-0.903) | 0.319<br>(0.213-0.435) | 0.458<br>(0.350-0.557) | 0.682<br>(0.500-0.846) |
| T2-FLAIR | II-IV     | 0.818<br>(0.765-0.865) | 0.773<br>(0.727-0.815) | 0.820<br>(0.736-0.891) | 0.757<br>(0.703-0.804) | 0.538<br>(0.457-0.624) | 0.924<br>(0.887-0.956) | 0.758<br>(0.662-0.843) | 0.748<br>(0.681-0.815) | 0.588<br>(0.444-0.731) | 0.812<br>(0.736-0.875) | 0.556<br>(0.406-0.692) | 0.831<br>(0.762-0.896) |
|          | II/III    | 0.745<br>(0.677-0.808) | 0.691<br>(0.636-0.745) | 0.820<br>(0.737-0.897) | 0.615<br>(0.542-0.693) | 0.556<br>(0.477-0.636) | 0.853<br>(0.780-0.915) | 0.655<br>(0.546-0.760) | 0.630<br>(0.543-0.716) | 0.588<br>(0.444-0.730) | 0.660<br>(0.540-0.771) | 0.556<br>(0.412-0.692) | 0.689<br>(0.574-0.804) |
| ADC      | II-IV     | 0.790<br>(0.740-0.836) | 0.752<br>(0.706-0.798) | 0.836<br>(0.754-0.909) | 0.723<br>(0.663-0.778) | 0.510<br>(0.424-0.593) | 0.928<br>(0.886-0.964) | 0.674<br>(0.574-0.767) | 0.697<br>(0.622-0.765) | 0.676<br>(0.536-0.800) | 0.706<br>(0.624-0.787) | 0.479<br>(0.349-0.600) | 0.845<br>(0.771-0.912) |
|          | II/III    | 0.683<br>(0.605-0.750) | 0.673<br>(0.606-0.727) | 0.836<br>(0.750-0.914) | 0.577<br>(0.495-0.657) | 0.537<br>(0.452-0.624) | 0.857<br>(0.783-0.923) | 0.538<br>(0.424-0.647) | 0.556<br>(0.457-0.642) | 0.676<br>(0.533-0.808) | 0.468<br>(0.348-0.588) | 0.479<br>(0.357-0.600) | 0.667<br>(0.531-0.800) |

Note: AUC = area under the curve; SEN = sensitivity; SPE = specificity; ACC = accuracy; PPV = positive predictive value; NPV = negative predictive value; Data within parentheses represent 95% confidence interval (CI); the performance metrics of single-layered radiomic signatures in prediction of 1p/19q codeletion status in grade IV gliomas could not be calculated because no patients had 1p/19q codeletion.

**Supplementary Table 7. The performance of single-layered radiomic signatures for prediction of TERT promoter mutation status**

| Sequence | WHO grade | Training cohort |               |               |               |               |               | Validation cohort |               |               |               |               |               |
|----------|-----------|-----------------|---------------|---------------|---------------|---------------|---------------|-------------------|---------------|---------------|---------------|---------------|---------------|
|          |           | AUC             | ACC           | SEN           | SPE           | PPV           | NPV           | AUC               | ACC           | SEN           | SPE           | PPV           | NPV           |
| T1WI     | II-IV     | 0.665           | 0.639         | 0.516         | 0.767         | 0.700         | 0.601         | 0.535             | 0.563         | 0.429         | 0.714         | 0.628         | 0.526         |
|          |           | (0.603-0.726)   | (0.588-0.689) | (0.433-0.590) | (0.703-0.835) | (0.618-0.779) | (0.534-0.664) | (0.445-0.629)     | (0.487-0.639) | (0.328-0.536) | (0.612-0.810) | (0.500-0.750) | (0.429-0.619) |
|          | II/III    | 0.705           | 0.661         | 0.562         | 0.753         | 0.682         | 0.646         | 0.487             | 0.519         | 0.378         | 0.694         | 0.607         | 0.472         |
| cT1WI    | II-IV     | (0.638-0.770)   | (0.600-0.721) | (0.471-0.653) | (0.671-0.826) | (0.590-0.769) | (0.570-0.721) | (0.378-0.598)     | (0.432-0.617) | (0.261-0.500) | (0.568-0.810) | (0.444-0.750) | (0.368-0.587) |
|          |           | IV              | 0.569         | 0.589         | 0.429         | 0.806         | 0.750         | 0.510             | 0.633         | 0.658         | 0.556         | 0.750         | 0.667         |
|          | II-IV     | (0.464-0.686)   | (0.493-0.685) | (0.310-0.550) | (0.677-0.920) | (0.600-0.889) | (0.391-0.625) | (0.479-0.778)     | (0.553-0.789) | (0.364-0.737) | (0.579-0.900) | (0.455-0.867) | (0.500-0.808) |
| T2WI     | II-IV     | 0.661           | 0.651         | 0.648         | 0.655         | 0.664         | 0.639         | 0.699             | 0.647         | 0.698         | 0.589         | 0.657         | 0.635         |
|          |           | (0.596-0.713)   | (0.597-0.702) | (0.576-0.723) | (0.575-0.726) | (0.585-0.736) | (0.563-0.709) | (0.619-0.775)     | (0.571-0.723) | (0.597-0.789) | (0.480-0.700) | (0.559-0.750) | (0.519-0.741) |
|          | II/III    | 0.649           | 0.630         | 0.538         | 0.718         | 0.642         | 0.622         | 0.675             | 0.617         | 0.667         | 0.556         | 0.652         | 0.571         |
| T2WI     | II-IV     | (0.573-0.717)   | (0.564-0.691) | (0.436-0.629) | (0.639-0.800) | (0.533-0.743) | (0.544-0.698) | (0.569-0.765)     | (0.531-0.704) | (0.545-0.787) | (0.417-0.689) | (0.533-0.762) | (0.429-0.719) |
|          |           | IV              | 0.619         | 0.699         | 0.857         | 0.484         | 0.692         | 0.714             | 0.758         | 0.711         | 0.778         | 0.650         | 0.667         |
|          | II-IV     | (0.505-0.737)   | (0.616-0.781) | (0.771-0.939) | (0.333-0.630) | (0.588-0.796) | (0.545-0.870) | (0.625-0.886)     | (0.579-0.816) | (0.611-0.938) | (0.471-0.826) | (0.500-0.840) | (0.588-0.933) |
| T2WI     | II-IV     | 0.650           | 0.660         | 0.746         | 0.569         | 0.645         | 0.680         | 0.573             | 0.529         | 0.571         | 0.482         | 0.554         | 0.500         |
|          |           | (0.587-0.710)   | (0.609-0.710) | (0.685-0.811) | (0.495-0.645) | (0.584-0.710) | (0.604-0.761) | (0.481-0.657)     | (0.454-0.605) | (0.467-0.679) | (0.367-0.596) | (0.452-0.655) | (0.383-0.615) |
|          | II/III    | 0.670           | 0.655         | 0.650         | 0.659         | 0.642         | 0.667         | 0.554             | 0.506         | 0.556         | 0.444         | 0.556         | 0.444         |
| T2WI     | II-IV     | (0.597-0.738)   | (0.594-0.715) | (0.565-0.740) | (0.571-0.742) | (0.557-0.730) | (0.583-0.750) | (0.441-0.662)     | (0.420-0.593) | (0.431-0.673) | (0.313-0.586) | (0.429-0.679) | (0.310-0.579) |
|          |           | IV              | 0.560         | 0.671         | 0.929         | 0.323         | 0.650         | 0.769             | 0.606         | 0.579         | 0.611         | 0.550         | 0.550         |
|          | II-IV     | (0.436-0.678)   | (0.589-0.753) | (0.857-0.979) | (0.182-0.469) | (0.544-0.754) | (0.563-0.933) | (0.441-0.759)     | (0.447-0.711) | (0.409-0.789) | (0.364-0.737) | (0.353-0.733) | (0.412-0.800) |
| T2-FLAIR | II-IV     | 0.582           | 0.580         | 0.484         | 0.681         | 0.615         | 0.556         | 0.482             | 0.496         | 0.397         | 0.607         | 0.532         | 0.472         |
|          |           | (0.521-0.646)   | (0.529-0.634) | (0.412-0.561) | (0.614-0.754) | (0.536-0.698) | (0.490-0.625) | (0.396-0.574)     | (0.420-0.580) | (0.302-0.500) | (0.508-0.712) | (0.410-0.660) | (0.379-0.571) |
|          | II/III    | 0.617           | 0.636         | 0.575         | 0.694         | 0.639         | 0.634         | 0.419             | 0.444         | 0.311         | 0.611         | 0.500         | 0.415         |
| T2-FLAIR | II-IV     | (0.544-0.688)   | (0.576-0.697) | (0.479-0.667) | (0.615-0.776) | (0.544-0.726) | (0.545-0.716) | (0.316-0.533)     | (0.358-0.531) | (0.200-0.436) | (0.471-0.750) | (0.343-0.647) | (0.296-0.526) |
|          |           | IV              | 0.520         | 0.452         | 0.310         | 0.645         | 0.542         | 0.408             | 0.592         | 0.605         | 0.611         | 0.600         | 0.579         |
|          | II-IV     | (0.406-0.645)   | (0.356-0.548) | (0.200-0.425) | (0.500-0.793) | (0.385-0.714) | (0.298-0.521) | (0.428-0.756)     | (0.474-0.737) | (0.400-0.810) | (0.400-0.778) | (0.381-0.762) | (0.444-0.813) |
| ADC      | II-IV     | 0.634           | 0.660         | 0.754         | 0.560         | 0.643         | 0.684         | 0.603             | 0.605         | 0.730         | 0.464         | 0.605         | 0.605         |
|          |           | (0.575-0.696)   | (0.605-0.710) | (0.692-0.814) | (0.480-0.638) | (0.582-0.712) | (0.600-0.759) | (0.520-0.686)     | (0.529-0.672) | (0.642-0.825) | (0.360-0.578) | (0.507-0.693) | (0.490-0.738) |
|          | II/III    | 0.665           | 0.667         | 0.663         | 0.671         | 0.654         | 0.679         | 0.526             | 0.531         | 0.644         | 0.389         | 0.569         | 0.467         |
| ADC      | II-IV     | (0.592-0.733)   | (0.606-0.727) | (0.575-0.753) | (0.585-0.753) | (0.564-0.736) | (0.597-0.763) | (0.424-0.635)     | (0.444-0.630) | (0.529-0.769) | (0.268-0.529) | (0.453-0.685) | (0.333-0.619) |
|          |           | IV              | 0.520         | 0.644         | 0.929         | 0.258         | 0.629         | 0.727             | 0.781         | 0.763         | 0.944         | 0.680         | 0.923         |
|          | II-IV     | (0.402-0.636)   | (0.548-0.740) | (0.857-0.978) | (0.133-0.394) | (0.524-0.732) | (0.500-0.917) | (0.645-0.891)     | (0.658-0.868) | (0.833-1.000) | (0.429-0.778) | (0.524-0.821) | (0.789-1.000) |

Note: AUC = area under the curve; SEN = sensitivity; SPE = specificity; ACC = accuracy; PPV = positive predictive value; NPV = negative predictive value; Data within parentheses represent 95% confidence interval (CI).

## **Supplementary Note 2: The hyper-parameters setting of Bayesian-regularization neural networks (BRNN) and the results of 10-fold cross-validation**

10-fold cross-validation was used to identify the optimal hyper-parameters in BRNN (epoch, neuron, mu, and defaults for others).

epoch: maximum number of epochs(iterations) to train

neuron: ndicates the number of neurons

mu: controls the behaviour of the Gauss-Newton optimization algorithm

### **IDH mutation status:**

#### **T1WI**

##### **AUC values in 10 folds**

best\_auc (0.818), best\_auc\_cv1 (0.831), best\_auc\_cv2 (0.909), best\_auc\_cv3 (0.783),  
best\_auc\_cv4 (0.762), best\_auc\_cv5 (0.754), best\_auc\_cv6 (0.831), best\_auc\_cv7 (0.862),  
best\_auc\_cv8 (0.838), best\_auc\_cv9 (0.890), best\_auc\_cv10 (0.721)

**hyper-parameters:** best\_epoch (300), best\_neuron (2), best\_mu (0.005)

#### **cT1WI**

##### **AUC values in 10 folds**

best\_auc (0.874), best\_auc\_cv1 (0.785), best\_auc\_cv2 (0.838), best\_auc\_cv3 (0.931),  
best\_auc\_cv4 (0.944), best\_auc\_cv5 (0.838), best\_auc\_cv6 (0.909), best\_auc\_cv7 (0.839),  
best\_auc\_cv8 (0.916), best\_auc\_cv9 (0.793), best\_auc\_cv10 (0.942)

**hyper-parameters:** best\_epoch (100), best\_neuron (1), best\_mu (0.001)

#### **T2WI**

##### **AUC values in 10 folds**

best\_auc (0.865), best\_auc\_cv1 (0.951), best\_auc\_cv2 (0.664), best\_auc\_cv3 (0.909),  
best\_auc\_cv4 (0.779), best\_auc\_cv5 (0.854), best\_auc\_cv6 (0.877), best\_auc\_cv7 (0.943),  
best\_auc\_cv8 (0.846), best\_auc\_cv9 (0.851), best\_auc\_cv10 (0.977)

**hyper-parameters:** best\_epoch (100), best\_neuron (3), best\_mu (0.002)

#### **T2-FLAIR**

##### **AUC values in 10 folds**

best\_auc (0.872), best\_auc\_cv1 (1.000), best\_auc\_cv2 (0.903), best\_auc\_cv3 (0.814),

best\_auc\_cv4 (0.909), best\_auc\_cv5 (0.832), best\_auc\_cv6 (0.881), best\_auc\_cv7 (0.908),  
best\_auc\_cv8 (0.929), best\_auc\_cv9 (0.877), best\_auc\_cv10 (0.671)

**hyper-parameters:** best\_epoch (250), best\_neuron (2), best\_mu (0.007)

#### **ADC**

##### **AUC values in 10 folds**

best\_auc (0.849), best\_auc\_cv1 (0.790), best\_auc\_cv2 (0.857), best\_auc\_cv3 (0.831),  
best\_auc\_cv4 (0.762), best\_auc\_cv5 (1.000), best\_auc\_cv6 (0.684), best\_auc\_cv7 (0.874),  
best\_auc\_cv8 (0.860), best\_auc\_cv9 (0.857), best\_auc\_cv10 (0.977)

**hyper-parameters:** best\_epoch (400), best\_neuron (4), best\_mu (0.007)

##### **1p/19q codeletion status:**

#### **T1WI**

##### **AUC values in 10 folds**

best\_auc (0.764), best\_auc\_cv1 (0.824), best\_auc\_cv2 (0.806), best\_auc\_cv3 (0.764),  
best\_auc\_cv4 (0.824), best\_auc\_cv5 (0.882), best\_auc\_cv6 (0.861), best\_auc\_cv7 (0.635),  
best\_auc\_cv8 (0.667), best\_auc\_cv9 (0.676), best\_auc\_cv10 (0.699)

**hyper-parameters:** best\_epoch (400), best\_neuron (2), best\_mu (0.005)

#### **cT1WI**

##### **AUC values in 10 folds**

best\_auc (0.790), best\_auc\_cv1 (0.759), best\_auc\_cv2 (0.750), best\_auc\_cv3 (0.861),  
best\_auc\_cv4 (0.815), best\_auc\_cv5 (0.849), best\_auc\_cv6 (0.917), best\_auc\_cv7 (0.892),  
best\_auc\_cv8 (0.725), best\_auc\_cv9 (0.618), best\_auc\_cv10 (0.713)

**hyper-parameters:** best\_epoch (100), best\_neuron (1), best\_mu (0.001)

#### **T2WI**

##### **AUC values in 10 folds**

best\_auc (0.763), best\_auc\_cv1 (0.794), best\_auc\_cv2 (0.750), best\_auc\_cv3 (0.806),  
best\_auc\_cv4 (0.639), best\_auc\_cv5 (0.778), best\_auc\_cv6 (0.784), best\_auc\_cv7 (0.778),  
best\_auc\_cv8 (0.716), best\_auc\_cv9 (0.861), best\_auc\_cv10 (0.722)

**hyper-parameters:** best\_epoch (100), best\_neuron (2), best\_mu (0.001)

#### **T2-FLAIR**

**AUC values in 10 folds**

best\_auc (0.815), best\_auc\_cv1 (0.951), best\_auc\_cv2 (0.814), best\_auc\_cv3 (0.873),  
best\_auc\_cv4 (0.889), best\_auc\_cv5 (0.769), best\_auc\_cv6 (0.741), best\_auc\_cv7 (0.620),  
best\_auc\_cv8 (0.676), best\_auc\_cv9 (0.926), best\_auc\_cv10 (0.889)

**hyper-parameters:** best\_epoch (100), best\_neuron (1), best\_mu (0.001)

**ADC****AUC values in 10 folds**

best\_auc (0.791), best\_auc\_cv1 (0.657), best\_auc\_cv2 (0.714), best\_auc\_cv3 (0.778),  
best\_auc\_cv4 (0.750), best\_auc\_cv5 (0.873), best\_auc\_cv6 (0.796), best\_auc\_cv7 (0.824),  
best\_auc\_cv8 (0.794), best\_auc\_cv9 (0.778), best\_auc\_cv10 (0.944)

**hyper-parameters:** best\_epoch (100), best\_neuron (5), best\_mu (0.002)

**TERT promoter mutation status:****T1WI****AUC values in 10 folds**

best\_auc (0.678), best\_auc\_cv1 (0.545), best\_auc\_cv2 (0.688), best\_auc\_cv3 (0.576),  
best\_auc\_cv4 (0.818), best\_auc\_cv5 (0.692), best\_auc\_cv6 (0.646), best\_auc\_cv7 (0.771),  
best\_auc\_cv8 (0.523), best\_auc\_cv9 (0.611), best\_auc\_cv10 (0.911)

**hyper-parameters:** best\_epoch (50), best\_neuron (1), best\_mu (0.001)

**cT1WI****AUC values in 10 folds**

best\_auc (0.657), best\_auc\_cv1 (0.764), best\_auc\_cv2 (0.591), best\_auc\_cv3 (0.788),  
best\_auc\_cv4 (0.596), best\_auc\_cv5 (0.561), best\_auc\_cv6 (0.597), best\_auc\_cv7 (0.729),  
best\_auc\_cv8 (0.621), best\_auc\_cv9 (0.660), best\_auc\_cv10 (0.667)

**hyper-parameters:** best\_epoch (700), best\_neuron (1), best\_mu (0.002)

**T2WI****AUC values in 10 folds**

best\_auc (0.634), best\_auc\_cv1 (0.653), best\_auc\_cv2 (0.778), best\_auc\_cv3 (0.632),  
best\_auc\_cv4 (0.506), best\_auc\_cv5 (0.558), best\_auc\_cv6 (0.667), best\_auc\_cv7 (0.625),  
best\_auc\_cv8 (0.742), best\_auc\_cv9 (0.682), best\_auc\_cv10 (0.500)

**hyper-parameters:** best\_epoch (100), best\_neuron (1), best\_mu (0.004)

## **T2-FLAIR**

### **AUC values in 10 folds**

best\_auc (0.609), best\_auc\_cv1 (0.636), best\_auc\_cv2 (0.590), best\_auc\_cv3 (0.528),  
best\_auc\_cv4 (0.727), best\_auc\_cv5 (0.618), best\_auc\_cv6 (0.494), best\_auc\_cv7 (0.508),  
best\_auc\_cv8 (0.674), best\_auc\_cv9 (0.681), best\_auc\_cv10 (0.632)

**hyper-parameters:** best\_epoch (100), best\_neuron (1), best\_mu (0.001)

## **ADC**

### **AUC values in 10 folds**

best\_auc (0.602), best\_auc\_cv1 (0.576), best\_auc\_cv2 (0.778), best\_auc\_cv3 (0.523),  
best\_auc\_cv4 (0.625), best\_auc\_cv5 (0.629), best\_auc\_cv6 (0.420), best\_auc\_cv7 (0.444),  
best\_auc\_cv8 (0.736), best\_auc\_cv9 (0.688), best\_auc\_cv10 (0.601)

**hyper-parameters:** best\_epoch (100), best\_neuron (1), best\_mu (0.001)

## **Supplementary Note 3: Confusion matrix of the image fusion models for predicting IDH, 1p/19q, and TERT status**

### **IDH mutation status:**

0-wild type; 1-mutation

[[actual 0, predict 0], [actual 0, predict 1]

[actual 1, predict 0], [actual 1, predict 1]]

### **Confusion matrix in the training cohort:**

[[113 20]

[ 11 94]]

### **Confusion matrix in the validation cohort:**

[[53 6]

[15 45]]

### **1p/19q codeletion status:**

0- intact; 1-codeletion

[[actual 0, predict 0], [actual 0, predict 1]



[actual 1, predict 0], [actual 1, predict 1]]

**Confusion matrix in the training cohort:**

[[112 65]

[5 56]]

**Confusion matrix in the validation cohort:**

[[59 26]

[7 27]]

**TERT promoter mutation status:**

0-wild type; 1-mutation

[[actual 0, predict 0], [actual 0, predict 1]

[actual 1, predict 0], [actual 1, predict 1]]

**Confusion matrix in the training cohort:**

[[ 59 57]

[ 20 102]]

**Confusion matrix in the validation cohort:**

[[25 31]

[10 53]]

**Supplementary Note 4: The formula of *image fusion models* for predicting IDH mutation, 1p19q codeletion, and TERT promoter mutation, which were built by logistic regression based on the scores of single-layered methods**

***Image fusion model for predicting IDH mutation***

$-0.0491 + 0.3785 * cT1WI + 0.7432 * ADC$

***Image fusion model for predicting 1p19q codeletion***

$0.0002 + 1.0221 * cT1WI$

***Image fusion model for predicting TERT promoter mutation***

$-0.2471 + 0.7025 * cT1WI + 0.7925 * ADC$

**Supplementary Figure 3:** The barplots for the training cohort and the validation cohort with the prediction value for each patient: (a-b) IDH prediction values in the training cohort and validation cohort; (c-d) 1p/19q prediction values in the training and validation cohorts; and (e-f) TERT prediction values in the training and validation cohorts.

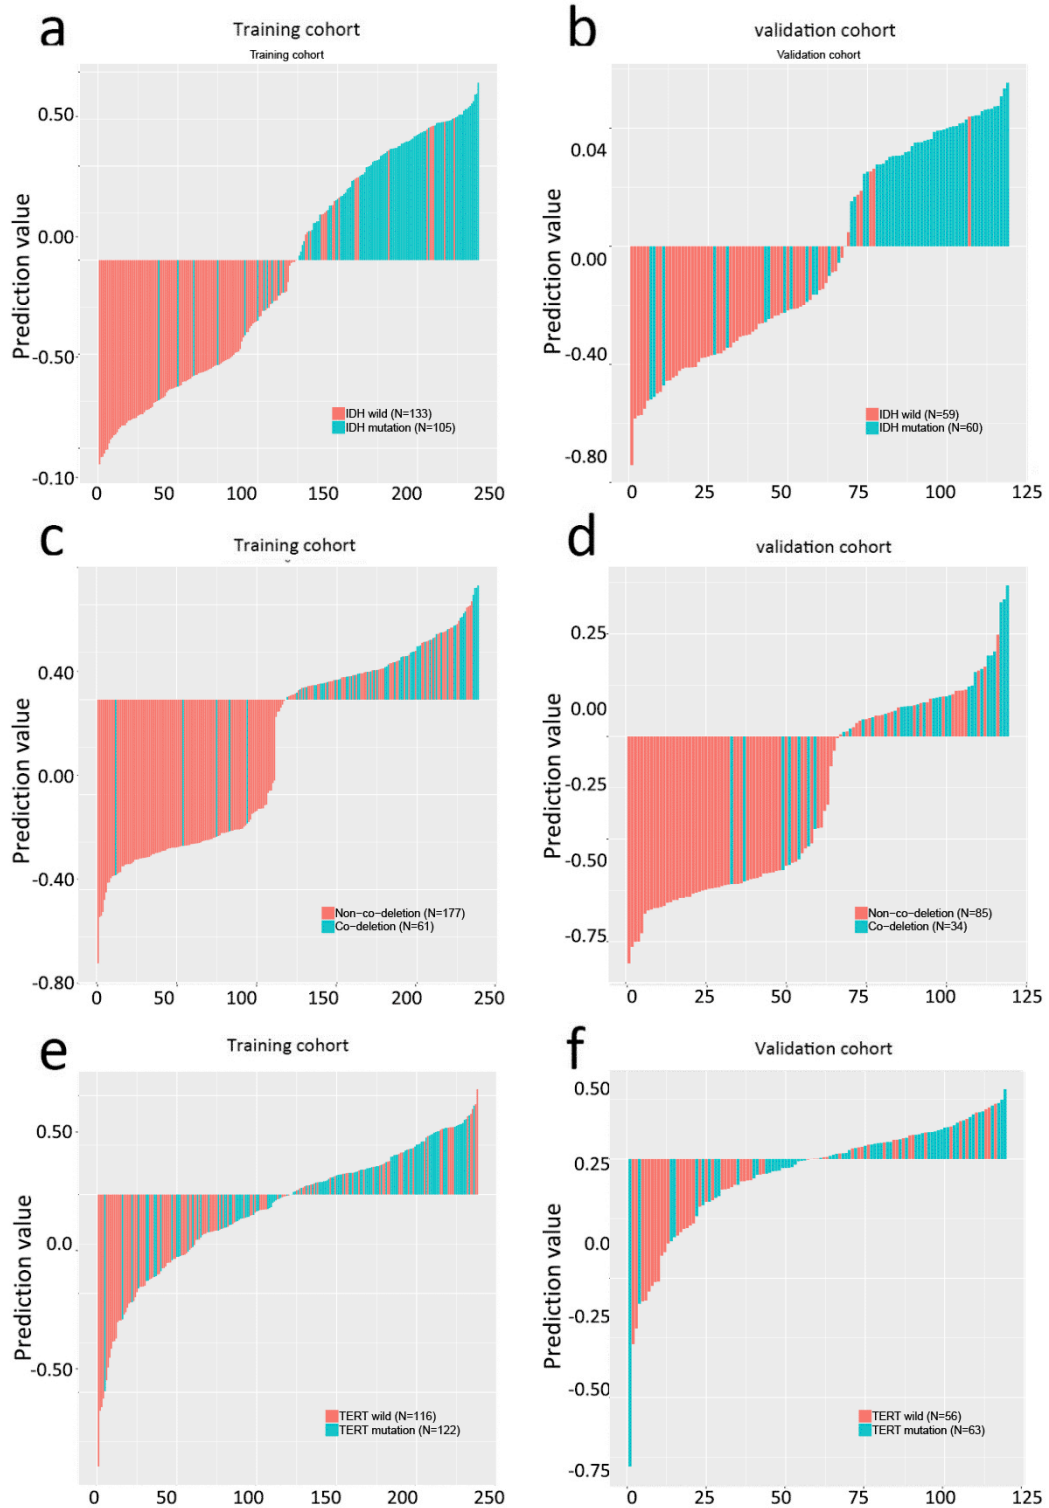

**Supplementary Figure 4.** Kaplan-Meier curves of molecular groups predicted by image fusion models. (a) PFS in the training cohort; (b) PFS in the validation cohort; (c) OS in the training cohort; and (d) OS in the validation cohort.

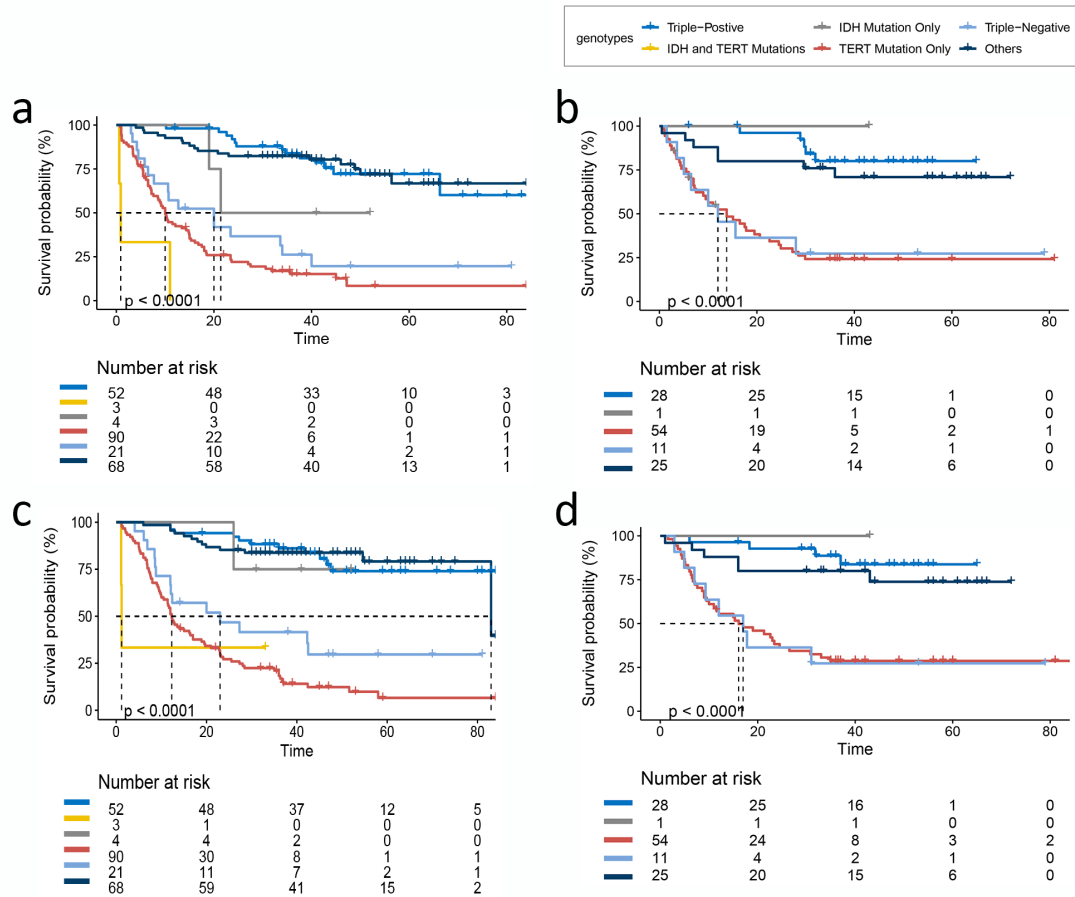

**Supplementary Note 5: The HRs and 95%CI for WHO grade and the predictive molecular groups in assessment of PFS and OS**

**PFS prediction:**

|                        | coef     | exp(coef) | se(coef) | z      | Pr(> z ) |     |
|------------------------|----------|-----------|----------|--------|----------|-----|
| as.factor(pred.class)2 | 3.12543  | 22.76978  | 0.65919  | 4.741  | 2.12e-06 | *** |
| as.factor(pred.class)3 | 0.52551  | 1.69132   | 0.76330  | 0.688  | 0.491160 |     |
| as.factor(pred.class)4 | 1.22907  | 3.41803   | 0.36078  | 3.407  | 0.000658 | *** |
| as.factor(pred.class)5 | 1.11413  | 3.04691   | 0.39814  | 2.798  | 0.005136 | **  |
| as.factor(pred.class)6 | -0.01607 | 0.98406   | 0.36910  | -0.044 | 0.965276 |     |
| WHO.Grade              | 0.85308  | 2.34687   | 0.15352  | 5.557  | 2.75e-08 | *** |

---  
 Signif. codes: 0 '\*\*\*' 0.001 '\*\*' 0.01 '\*' 0.05 '.' 0.1 ' ' 1

|                        | exp(coef) | exp(-coef) | lower .95 | upper .95 |
|------------------------|-----------|------------|-----------|-----------|
| as.factor(pred.class)2 | 22.7698   | 0.04392    | 6.2554    | 82.882    |
| as.factor(pred.class)3 | 1.6913    | 0.59126    | 0.3789    | 7.550     |
| as.factor(pred.class)4 | 3.4180    | 0.29257    | 1.6853    | 6.932     |
| as.factor(pred.class)5 | 3.0469    | 0.32820    | 1.3963    | 6.649     |
| as.factor(pred.class)6 | 0.9841    | 1.01620    | 0.4774    | 2.029     |
| WHO.Grade              | 2.3469    | 0.42610    | 1.7371    | 3.171     |

Concordance= 0.799 (se = 0.017 )  
 Likelihood ratio test= 152.3 on 6 df, p=<2e-16  
 Wald test = 128.3 on 6 df, p=<2e-16  
 Score (logrank) test = 179.3 on 6 df, p=<2e-16

Note: Pred.class 2 = IDH and TERT mutation, Pred.class 3 = IDH mutation only, Pred.class 4 = TERT mutation only, Pred.class 5 = Triple negative, Pred-class 6 = others

**OS prediction:**

|                        | coef     | exp(coef) | se(coef) | z      | Pr(> z )     |
|------------------------|----------|-----------|----------|--------|--------------|
| as.factor(pred.class)2 | 1.94157  | 6.96969   | 0.77848  | 2.494  | 0.01263 *    |
| as.factor(pred.class)3 | -0.05871 | 0.94298   | 1.04803  | -0.056 | 0.95532      |
| as.factor(pred.class)4 | 1.17227  | 3.22933   | 0.38348  | 3.057  | 0.00224 **   |
| as.factor(pred.class)5 | 0.92955  | 2.53336   | 0.42867  | 2.168  | 0.03012 *    |
| as.factor(pred.class)6 | -0.09292 | 0.91126   | 0.41065  | -0.226 | 0.82098      |
| WHO.Grade              | 0.97421  | 2.64907   | 0.16466  | 5.916  | 3.29e-09 *** |

---

Signif. codes: 0 '\*\*\*' 0.001 '\*\*' 0.01 '\*' 0.05 '.' 0.1 ' ' 1

|                        | exp(coef) | exp(-coef) | lower .95 | upper .95 |
|------------------------|-----------|------------|-----------|-----------|
| as.factor(pred.class)2 | 6.9697    | 0.1435     | 1.5156    | 32.052    |
| as.factor(pred.class)3 | 0.9430    | 1.0605     | 0.1209    | 7.355     |
| as.factor(pred.class)4 | 3.2293    | 0.3097     | 1.5230    | 6.847     |
| as.factor(pred.class)5 | 2.5334    | 0.3947     | 1.0935    | 5.869     |
| as.factor(pred.class)6 | 0.9113    | 1.0974     | 0.4075    | 2.038     |
| WHO.Grade              | 2.6491    | 0.3775     | 1.9184    | 3.658     |

Concordance= 0.806 (se = 0.017 )

Likelihood ratio test= 160.1 on 6 df, p=<2e-16

Wald test = 124 on 6 df, p=<2e-16

Score (logrank) test = 179.7 on 6 df, p=<2e-16

Note: Pred.class 2 = IDH and TERT mutation, Pred.class 3 = IDH mutation only, Pred.class 4 = TERT mutation only, Pred.class 5 = Triple negative, Pred.class 6 = others
